# Supplementary material for: Integrated Analysis and Identification of Critical RNA-Binding Proteins in Bladder Cancer
Source: MDPI journal article supplement (doi:10.3390/cancers14153739), 2022-07-31
Supplement: s1 [file s1]

# Integrated Analysis and Identification of Critical RNA-Binding Proteins in Bladder Cancer

Lijiang Gu, Yuhang Chen, Xing Li, Yibo Mei, Jinlai Zhou, Jianbin Ma, Mengzhao Zhang, Tao Hou, Dalin He and Jin Zeng

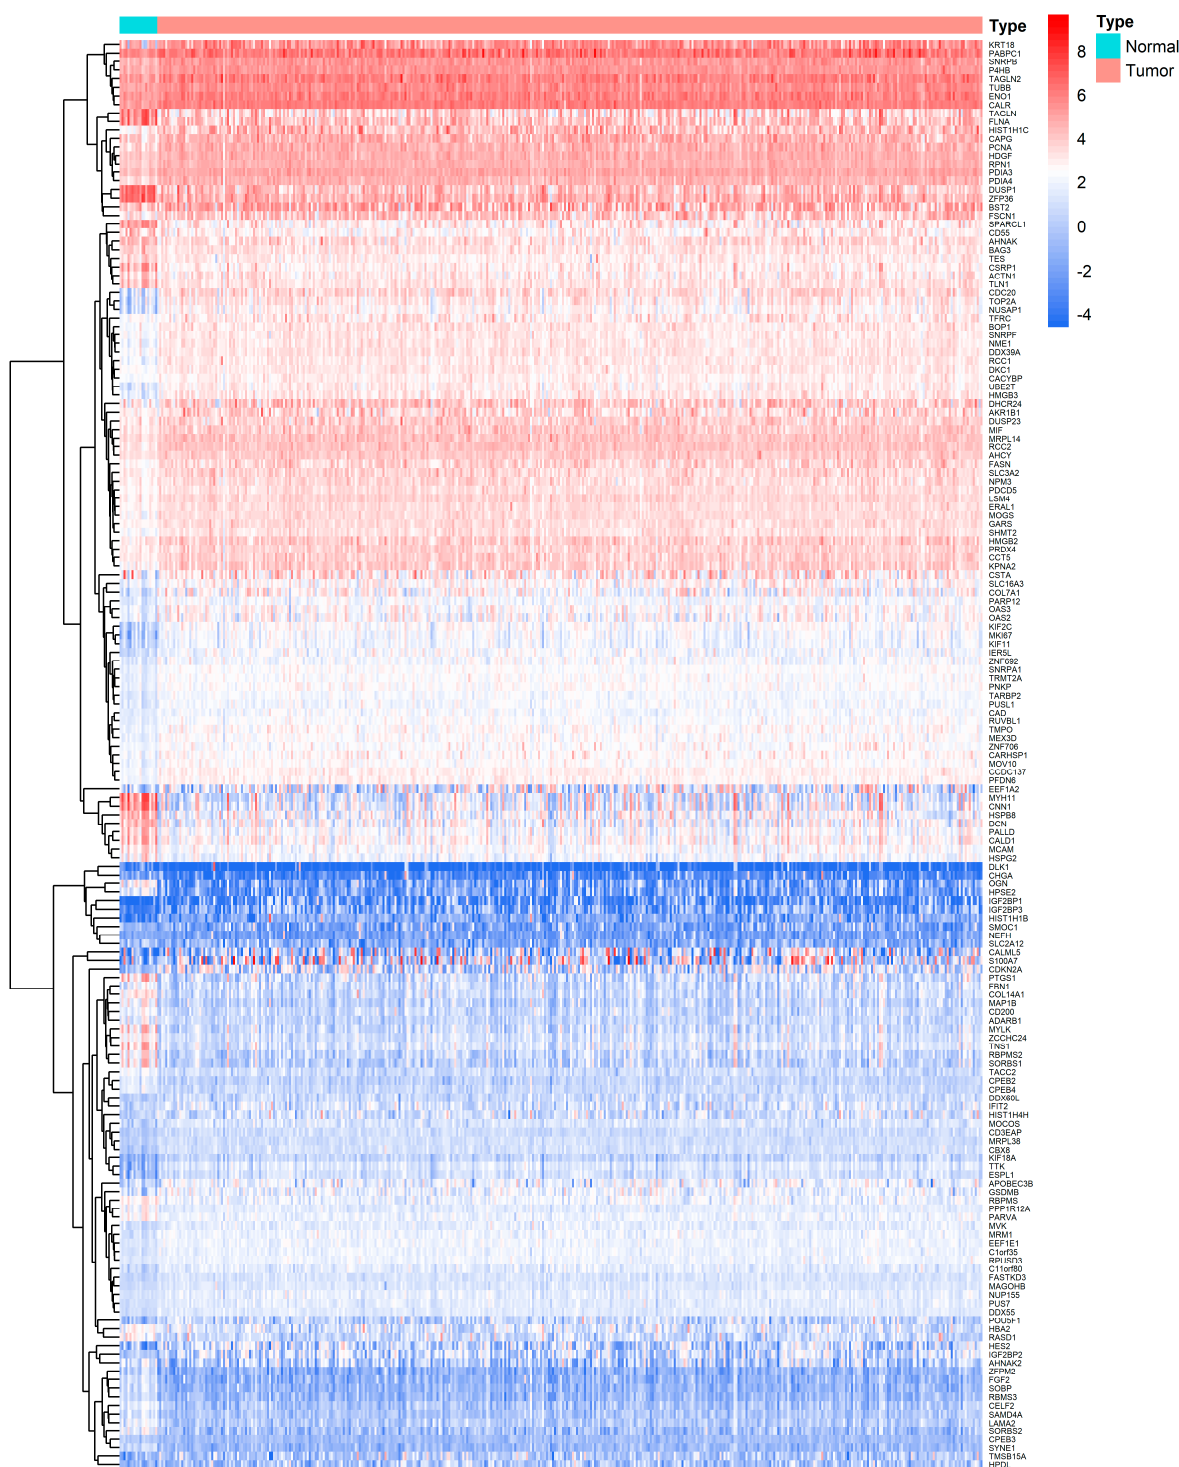

**Figure S1.** Heat map of differentially expressed RNA-binding proteins (RBPs) in bladder cancer (BC) from TCGA.

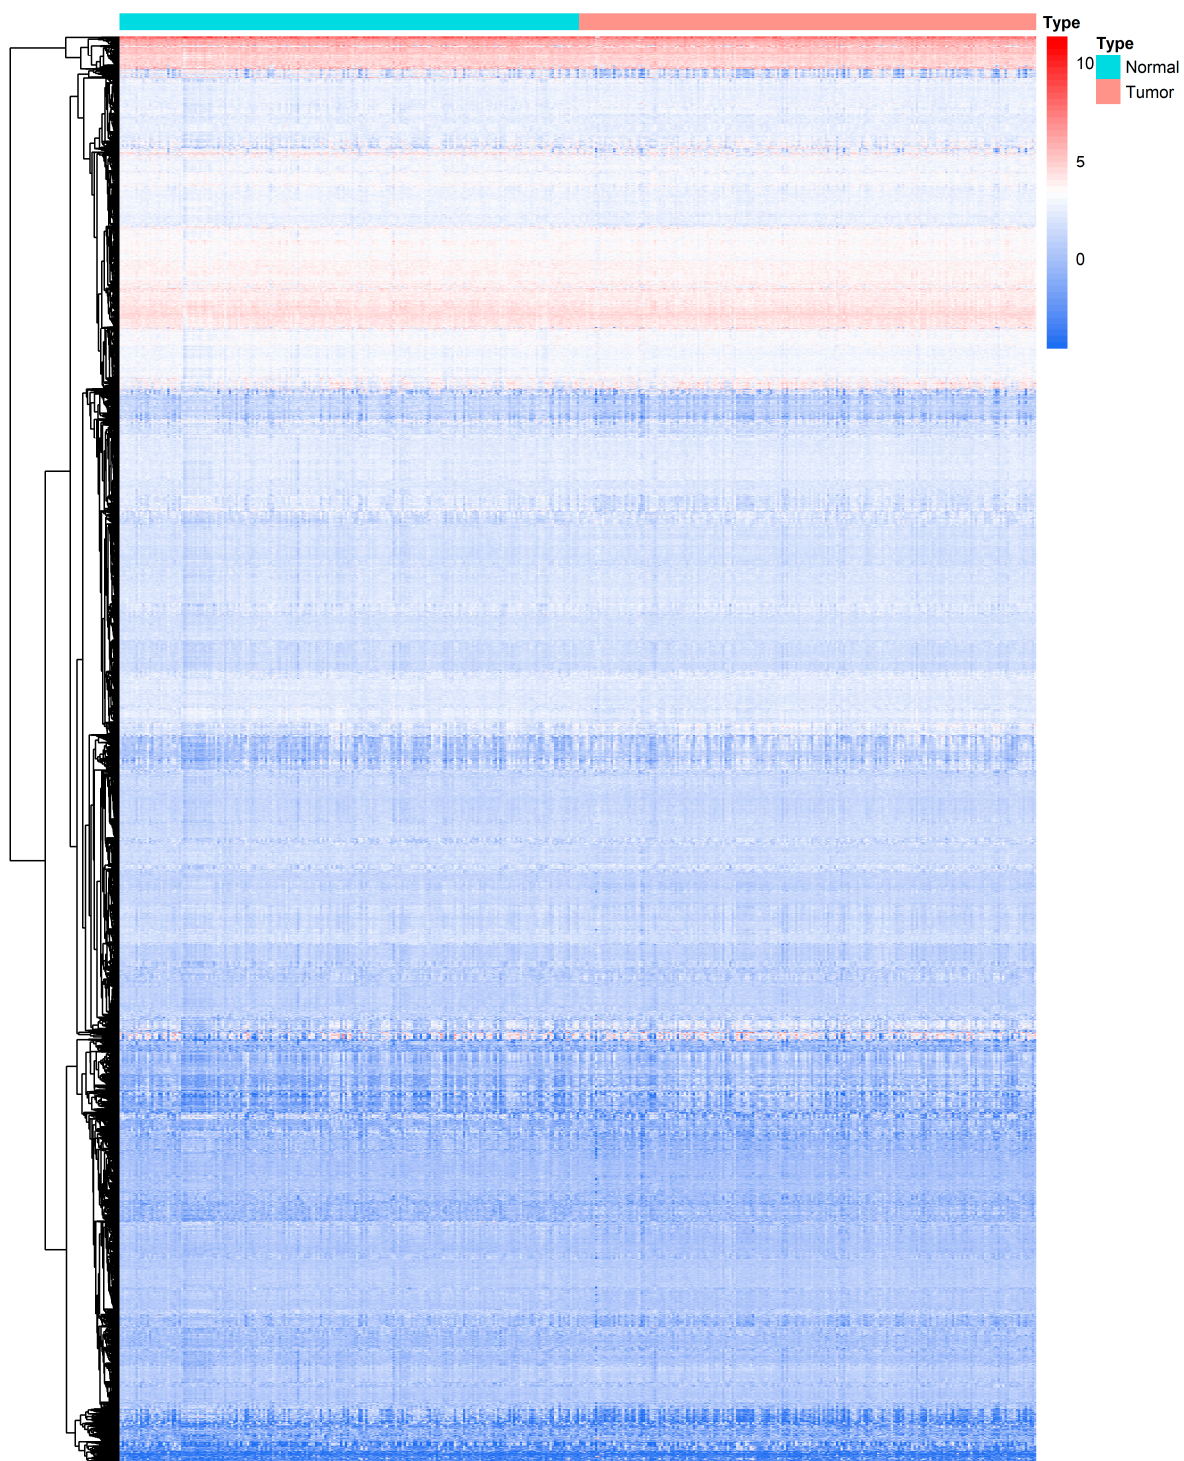

**Figure S2.** Analysis of differentially expressed genes between the low- and high-risk groups ( $p < 0.001$ ,  $|\log_2FC| > 1.0$ ).

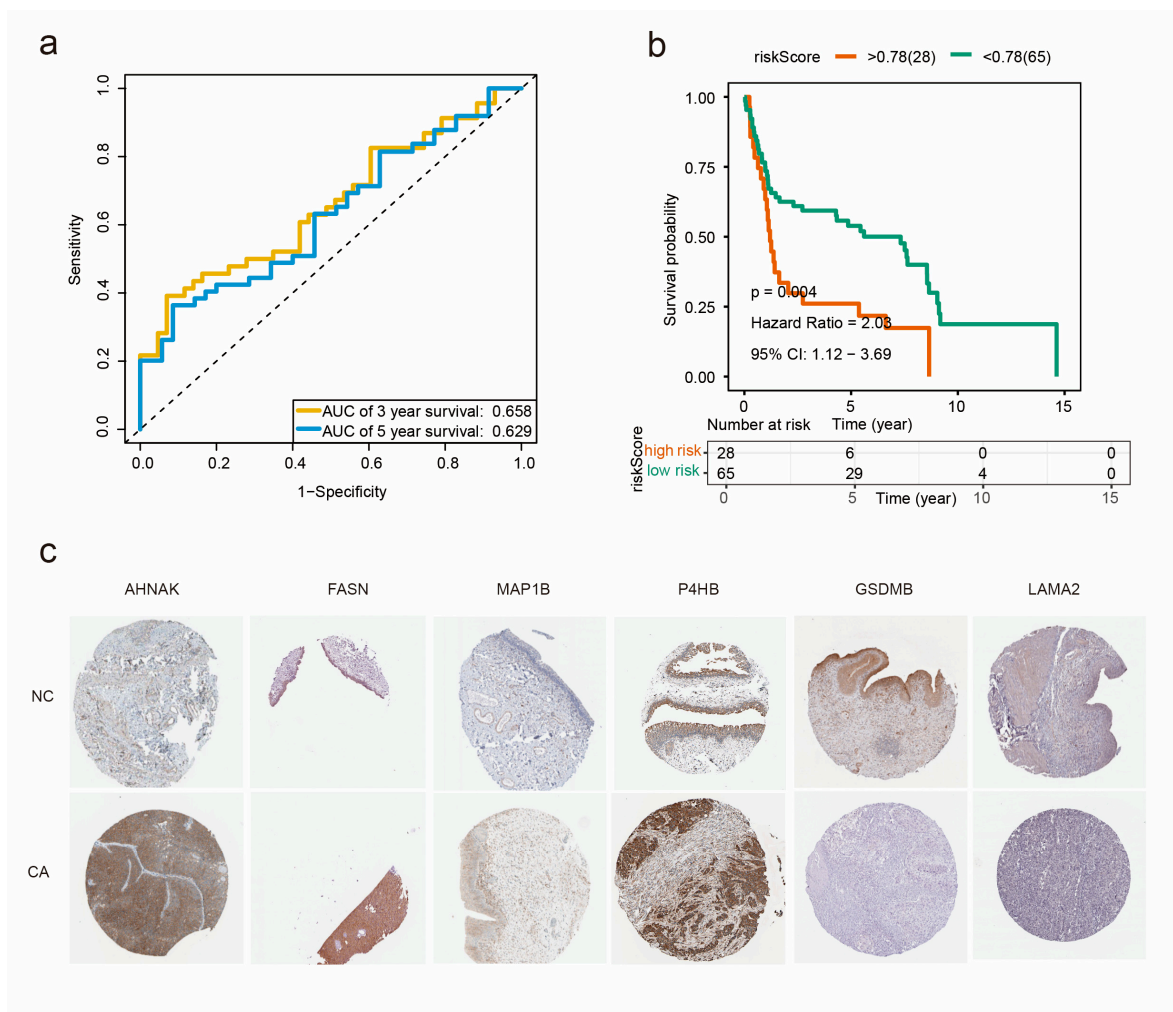

**Figure S3.** ROC curve for the test set (GSE31684); b The test set (GSE31684) survival analysis curves of the six RBPs were derived by creating the prognostic model shown in the forest map. Yellow indicates patients in the high-risk group, and blue indicates patients in the low-risk group; c Immunohistochemical results of the six RBPs in BC from the Human Protein Atlas database.



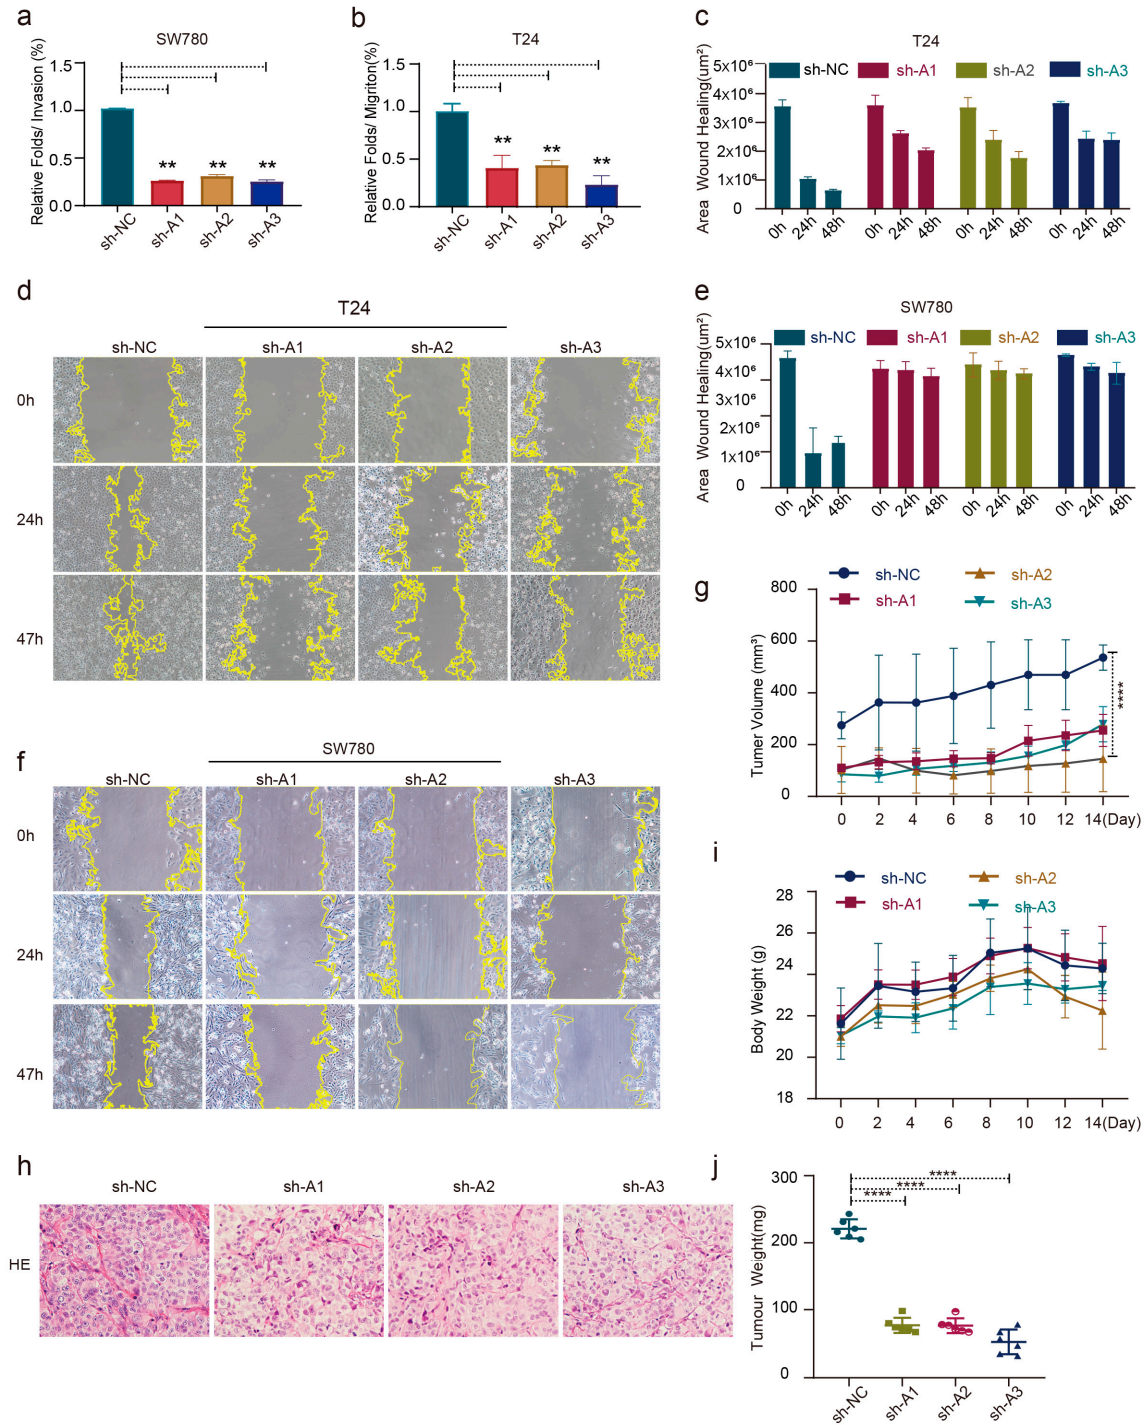

**Figure S4.** Analysis results of AHNAK-knockdown (KD) SW780 migration (a) and T24 invasion (b). AHNAK KD T24 and SW780 cells were observed using a microscope 0, 24, and 48 h after the scratch (c-f). Results of tumor volume (g) and weight analysis (i). H&E staining analysis of tumor tissues (h) (\*  $p < 0.05$ , \*\*  $p < 0.01$ , \*\*\*  $p < 0.001$ , and \*\*\*\*  $p < 0.0001$ ).

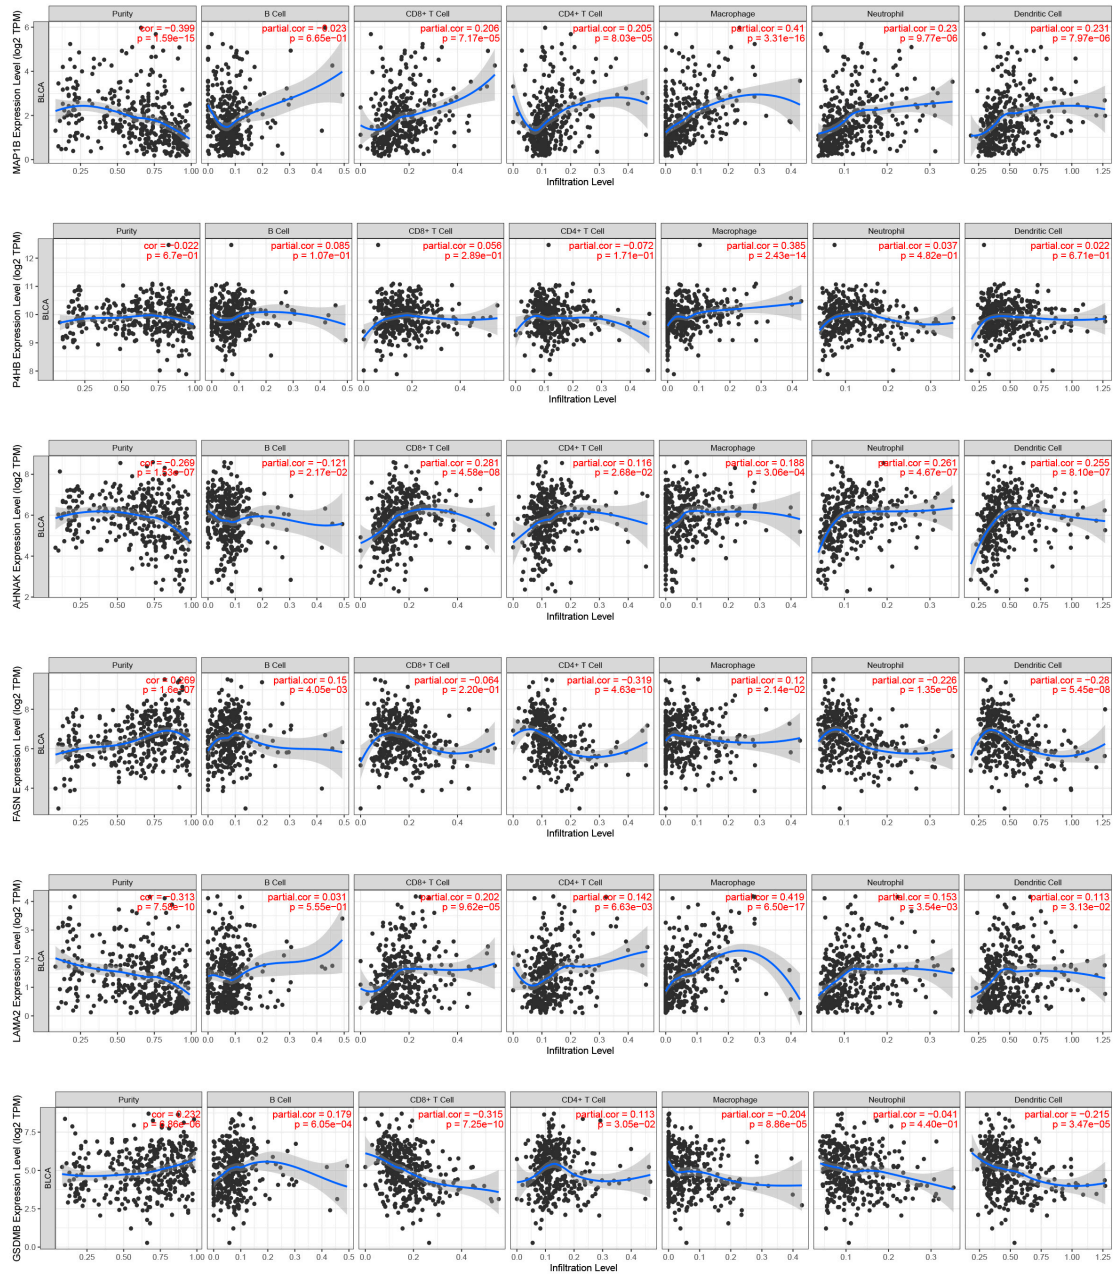

**Figure S5.** Correlation of six-RBP expression with macrophage- and neutrophil-immune infiltration levels in BC.
